# Supplementary material for: Optimized Liquid-Phase Exfoliation of Magnetic van der Waals Heterostructures: Towards the Single Layer and Deterministic Fabrication of Devices
Source: MDPI journal article supplement (doi:10.3390/molecules26237371), 2021-12-04
Supplement: s1 [file s1]

Supplementary Material

# Optimized Liquid-Phase Exfoliation of Magnetic van der Waals Heterostructures: Towards the Single Layer and Deterministic Fabrication of Devices

Lucía Martín-Pérez <sup>1</sup> and Enrique Burzuri <sup>1,2,\*</sup>

<sup>1</sup> IMDEA Nanociencia, Calle Faraday 9, Campus de Cantoblanco, 28049 Madrid, Spain; lucia.martin@imdea.org

<sup>2</sup> Departamento de Física de la Materia Condensada, Universidad Autónoma de Madrid, 28049 Madrid, Spain

\* Correspondence: enrique.burzuri@uam.es

## Index

|                                                                                   |    |
|-----------------------------------------------------------------------------------|----|
| 1. Additional Scanning Electron Microscopy (SEM) images of bulk cylindrite. ....  | 2  |
| 2. Supplementary Table 1. Interpretation of the Raman spectra of cylindrite. .... | 3  |
| 3. Additional AFM images and statistical details in Sample 1. ....                | 3  |
| 4. Additional AFM images and statistical details in Sample 3. ....                | 5  |
| 5. AFM characterization of Samples 2 and 4. ....                                  | 7  |
| 6. Additional AFM images and statistical details in Sample 5. ....                | 10 |
| 7. Statistical analysis of type 1 LPE cylindrite nanoflakes. ....                 | 12 |
| 8. Additional SEM images of LPE cylindrite-based devices after DEP assembly. .... | 13 |
| 9. Mathematical description of the equivalent R-CR electrical model. ....         | 14 |

### 1. Additional Scanning Electron Microscopy (SEM) images of bulk cylindrite.

Figure S1 shows the surface of the single cylindrite cylinder reported in Figure 1 (main manuscript). Figures S2, S3 and S4 show cylinder transverse-planes. A series of concentric layers can be clearly observed. The laminar nature of the material allows its exfoliation.

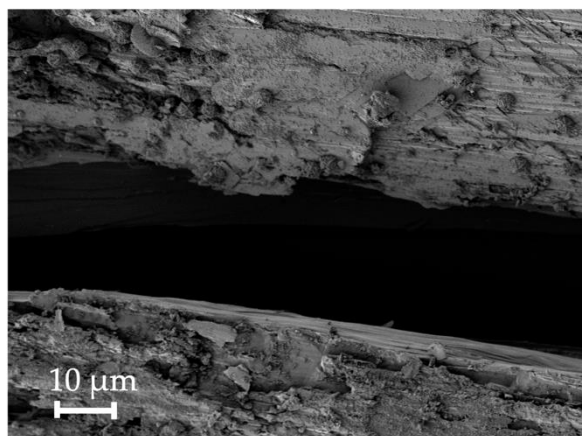

**Figure S1.** SEM image of a single cylindrite cylinder.

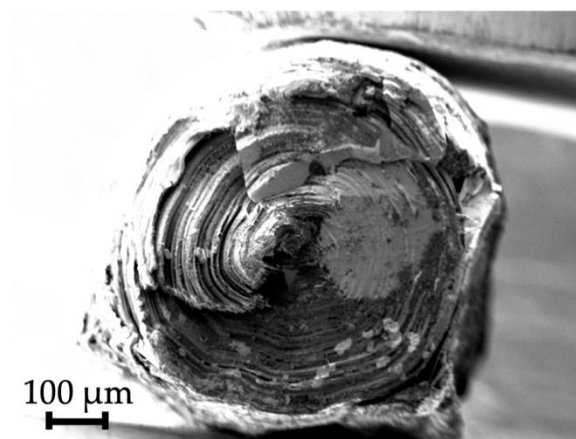

**Figure S2.** SEM image of the transversal-plane of a single cylindrite cylinder.

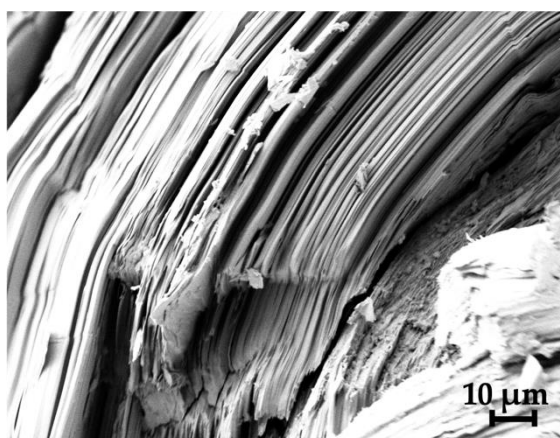

**Figure S3.** SEM image of the transversal-plane of a single cylindrite cylinder.

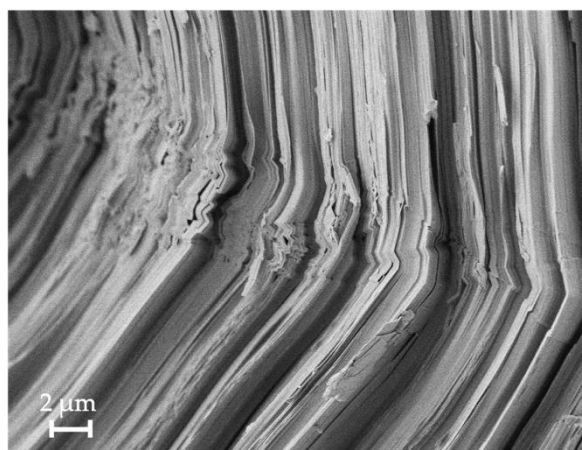

**Figure S4.** SEM image of the transversal-plane of a single cylindrite cylinder.

## 2. Supplementary Table 1. Interpretation of the Raman spectra of cylindrite.

Supplementary Table 1 shows the labelling and interpretation of the different Raman modes of cylindrite as reported for other mineral members of the sulfosalt family [38–41].

**Table S1.** Interpretation of the Raman spectra of cylindrite.

| Raman Shift ( $\text{cm}^{-1}$ ) | Phonon Mode Attribution                    | Compound               |
|----------------------------------|--------------------------------------------|------------------------|
| 70                               | Acoustic                                   | PbS                    |
| 90                               | $A_{1g}$                                   | SnS                    |
|                                  | 2 <sup>nd</sup> order effect               | SnS <sub>2</sub>       |
| 153                              | Transverse acoustic and transverse optical | PbS                    |
|                                  | Longitudinal optical                       | PbS                    |
| 189                              | $E_g$                                      | SnS <sub>2</sub>       |
| 242                              | Combination                                | PbS + SnS <sub>2</sub> |
| 305                              | $A_{1g}$                                   | SnS <sub>2</sub>       |

## 3. Additional AFM images and statistical details in Sample 1.

Figures S5 and S6 show the routine used to identify type 1 and type 2 flakes in Sample 1 shown in Figure 2a of the main manuscript. Type 1 flakes are blue-highlighted in Figure S5 whereas type 2 flakes are highlighted in Figure S6. The selection and statistical analysis is performed by Gwyddion and WSxM software [51].

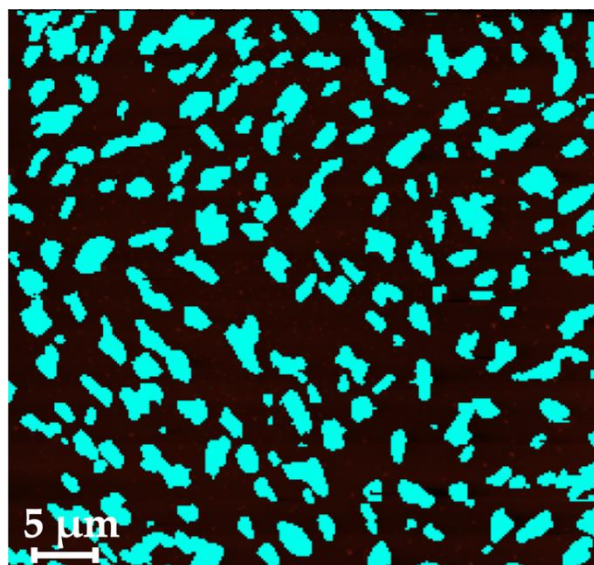

**Figure S5.** Type 1 flakes size selection of Sample 1 AFM image ( $50 \times 50 \mu\text{m}^2$ ), carried out with Gwyddion software.

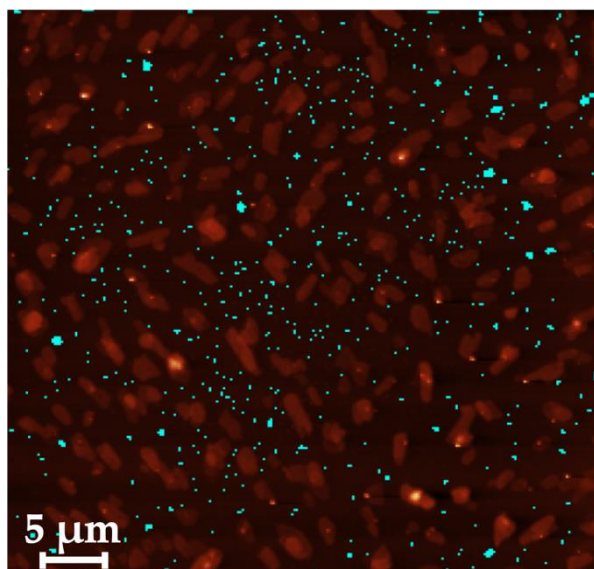

**Figure S6.** Type 2 flakes size selection of Sample 1 AFM image ( $50 \times 50 \mu\text{m}^2$ ), carried out with Gwyddion software.

Figures S7 and S8 show additional AFM images of cylindrite nanoflakes obtained in Sample 1 (Exfoliation parameters: 1 h sonication and 30 min centrifugation). The AFM samples are prepared by spin-coating the dispersion onto silicon wafer and dried in air.

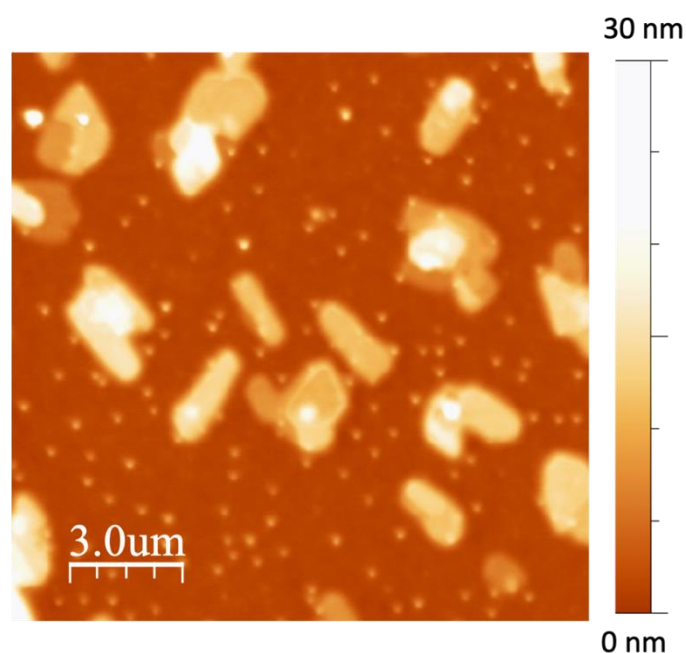

**Figure S7.** AFM topographic characterization of cylindrite nanoflakes obtained in Sample 1. Image dimension:  $50 \times 50 \mu\text{m}^2$ .

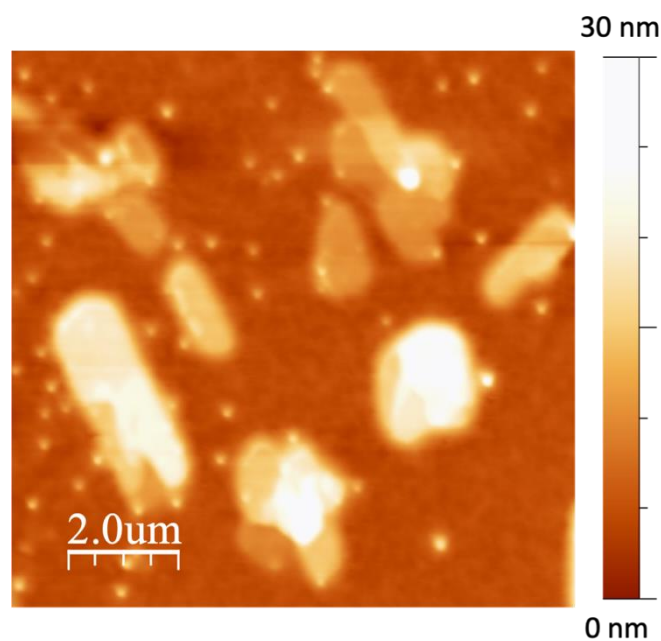

**Figure S8.** AFM topographic characterization of cylindrite nanoflakes obtained in Sample 1. Image dimension:  $20 \times 20 \mu\text{m}^2$ .

#### 4. Additional AFM images and statistical details in Sample 3.

Figures S9 and S10 show the routine used to identify type 1 and type 2 flakes in Sample 3 shown in Figure 2f of the main manuscript. Type 1 flakes are green-highlighted in Figure S9 whereas type 2 flakes are highlighted in Figure S10. The selection and statistical analysis is performed by Gwyddion and WSxM software [51].

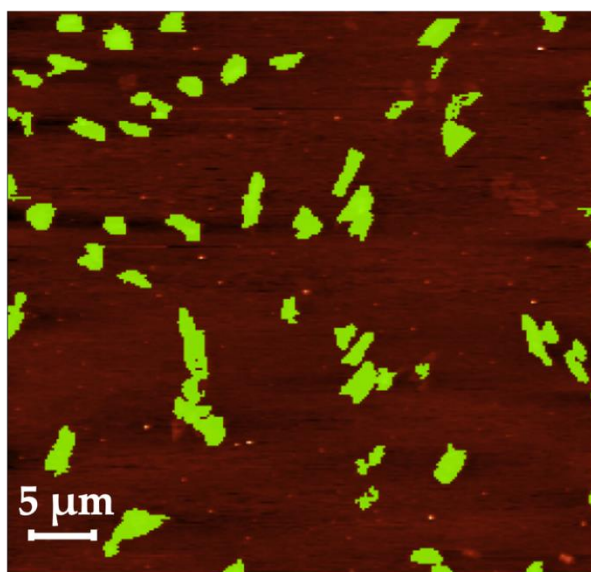

**Figure S9.** Type 1 flakes size selection of Sample 3 AFM image ( $50 \times 50 \mu\text{m}^2$ ), carried out with Gwyddion software.

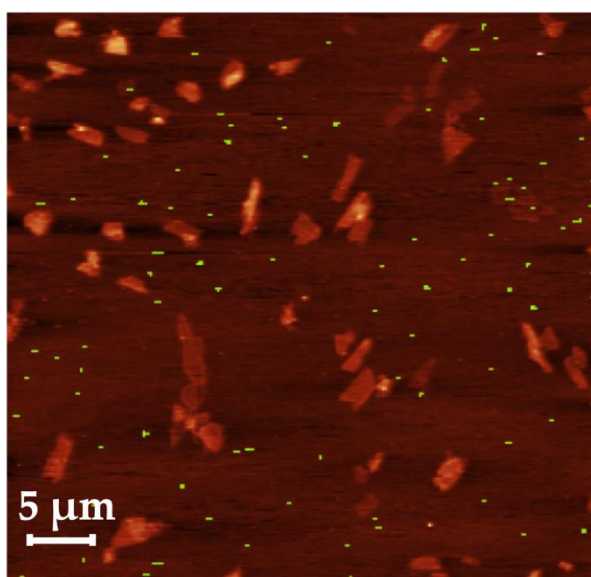

**Figure S10.** Type 2 flakes size selection of Sample 3 AFM image ( $50 \times 50 \mu\text{m}^2$ ), carried out with Gwyddion software.

Figures S11 and S12 shows additional AFM images of cylindrite nanoflakes obtained in Sample 3 (Exfoliation parameters: 2 h sonication and 1 h centrifugation). The AFM samples are prepared by spin-coating the dispersion onto silicon wafer and dried in air.



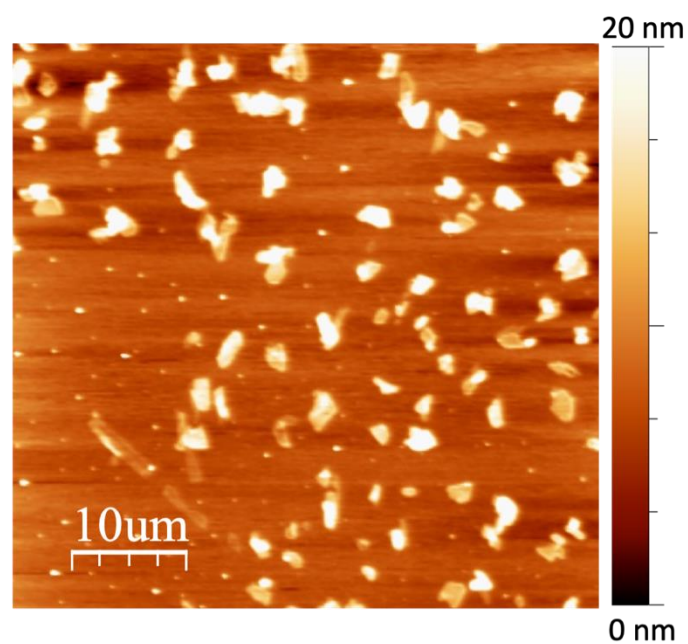

**Figure S11.** AFM topographic characterization of cylindrite nanoflakes obtained in Sample 3. Image dimension:  $50 \times 50 \mu\text{m}^2$ .

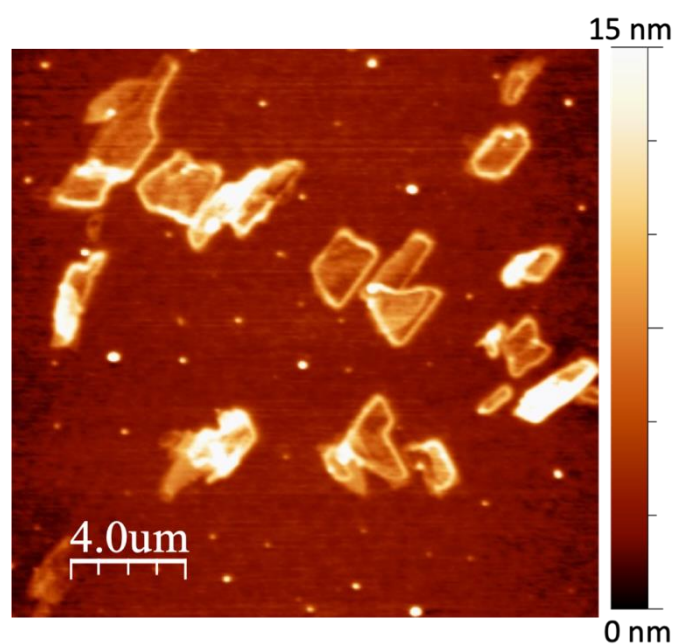

**Figure S12.** AFM topographic characterization of cylindrite nanoflakes obtained in Sample 3. Image dimension:  $20 \times 20 \mu\text{m}^2$ .

#### 5. AFM characterization of Samples 2 and 4.

Figures S13, S14 and S15 show the AFM study of Sample 2. The nanoflakes present no morphology, size nor shape defined. The AFM samples are prepared by spin-coating the dispersion onto silicon wafer and dried in air.

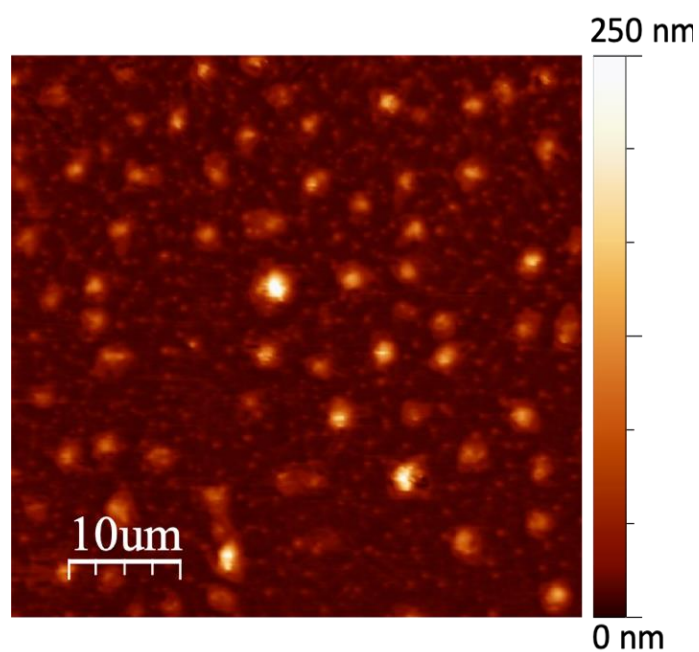

**Figure S13.** AFM topographic characterization of cylindrite nanoflakes obtained in Sample 2. Images dimension:  $50 \times 50 \mu\text{m}^2$ .

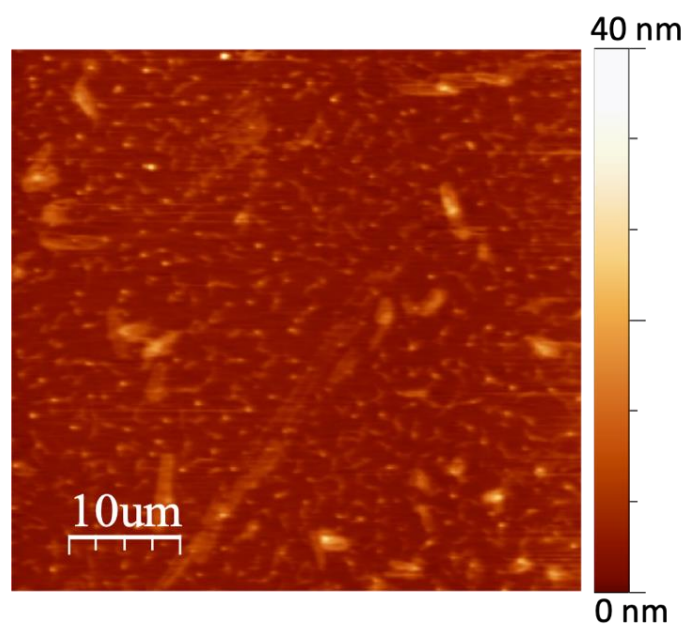

**Figure S14.** AFM topographic characterization of cylindrite nanoflakes obtained in Sample 2. Images dimension:  $50 \times 50 \mu\text{m}^2$ .



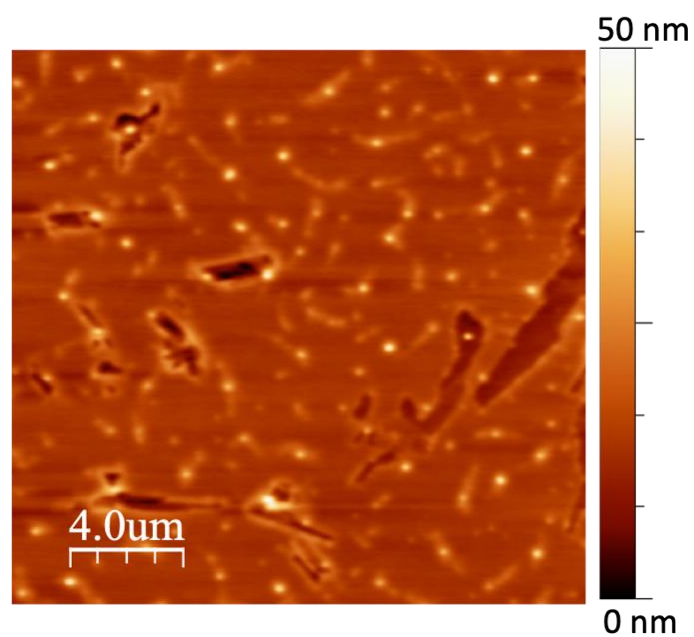

**Figure S15.** AFM topographic characterization of cylindrite nanoflakes obtained in Sample 2. Images dimension:  $20 \times 20 \mu\text{m}^2$ .

Figures S16, S17 and S18 show the AFM study of Sample 4. The nanoflakes present no morphology, size nor shape defined. The AFM samples are prepared by spin-coating the dispersion onto silicon wafer and dried in air.

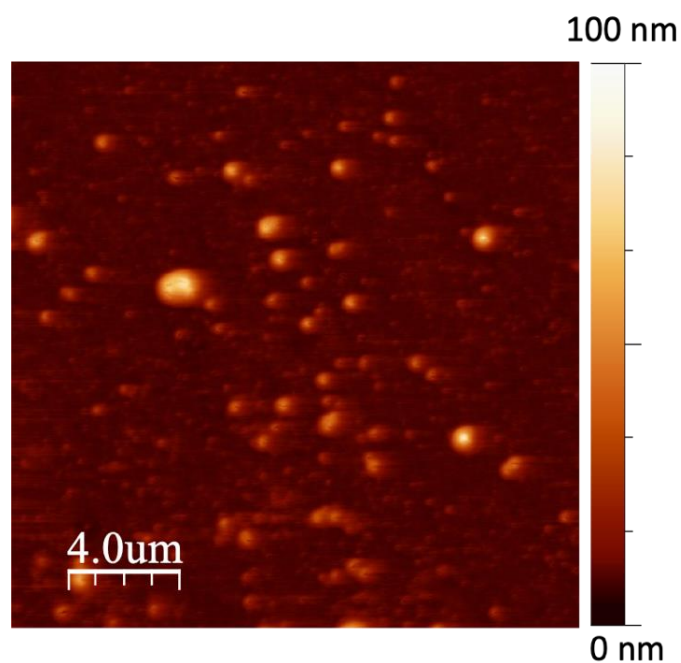

**Figure S16.** AFM topographic characterization of cylindrite nanoflakes obtained in Sample 2. Image dimension:  $20 \times 20 \mu\text{m}^2$ .

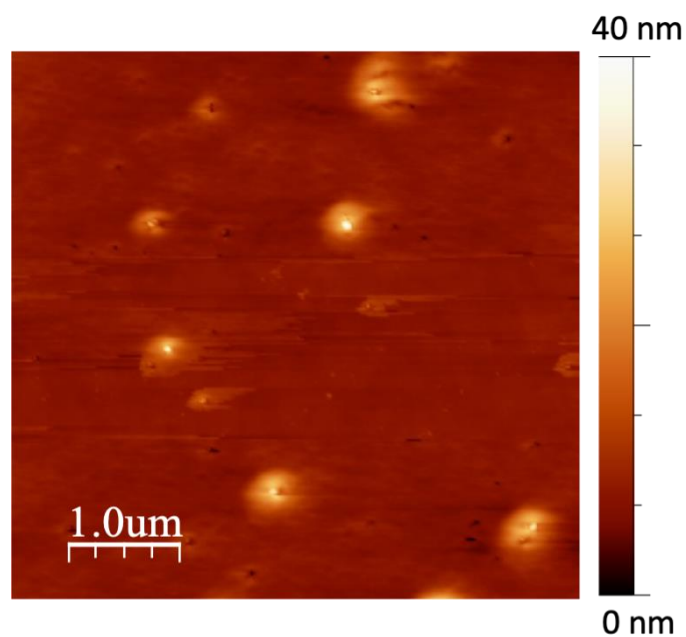

**Figure S17.** AFM topographic characterization of cylindrite nanoflakes obtained in Sample 4. Image dimension:  $5 \times 5 \mu\text{m}^2$ .

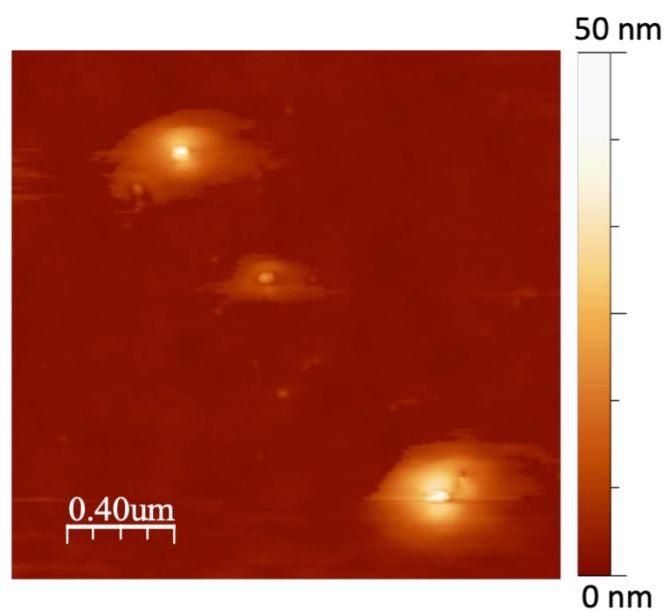

**Figure S18.** AFM topographic characterization of cylindrite nanoflakes obtained in Sample 4. Image dimension:  $2 \times 2 \mu\text{m}^2$ .

#### 6. Additional AFM images and statistical details in Sample 5.

Figures S19 and S20 show the routine used to identify type 1 and type 2 flakes in Sample 5 shown in Figure 3a of the main manuscript. Type 1 flakes are green-highlighted in Figure S19 whereas type 2 flakes are highlighted in Figure S20. The selection and statistical analysis is performed by Gwyddion and WSxM software [51].

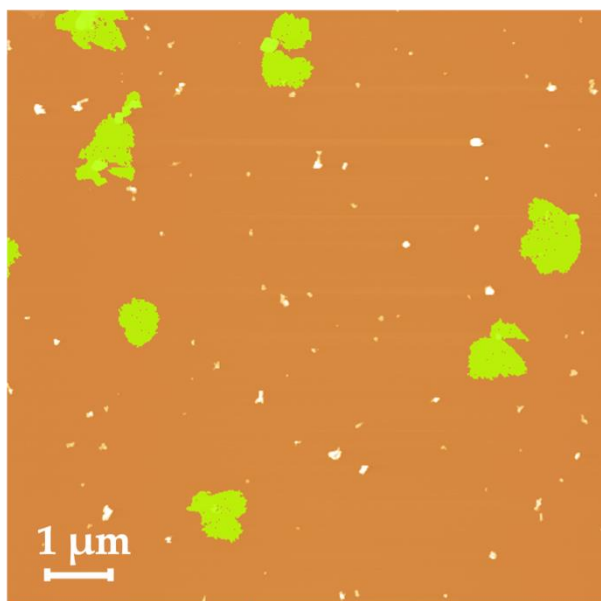

**Figure S19.** Type 1 flakes size selection of Sample 5 AFM image ( $10 \times 10 \mu\text{m}^2$ ), carried out with Gwyddion software.

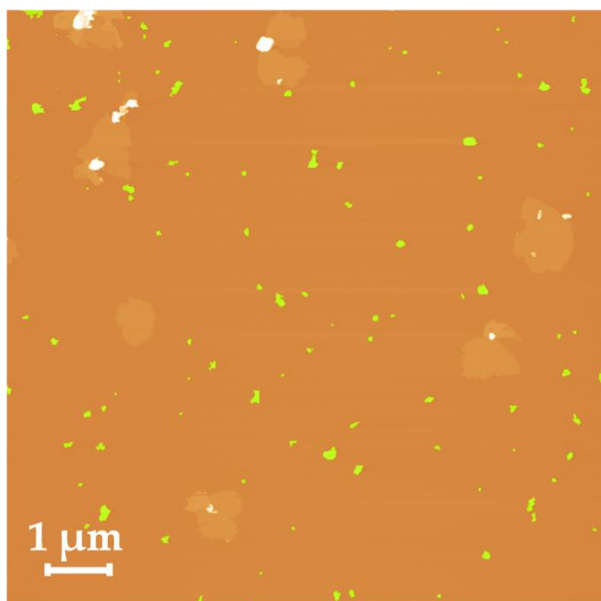

**Figure S20.** Type 2 flakes size selection of Sample 5 AFM image ( $50 \times 50 \mu\text{m}^2$ ), carried out with Gwyddion software.

Figures S21 and S22 show additional AFM images of cylindrite nanoflakes obtained in Sample 5 (Exfoliation parameters: 3 h sonication and 1 h centrifugation). The AFM samples are prepared by spin-coating the dispersion onto mica foil and dried in air.

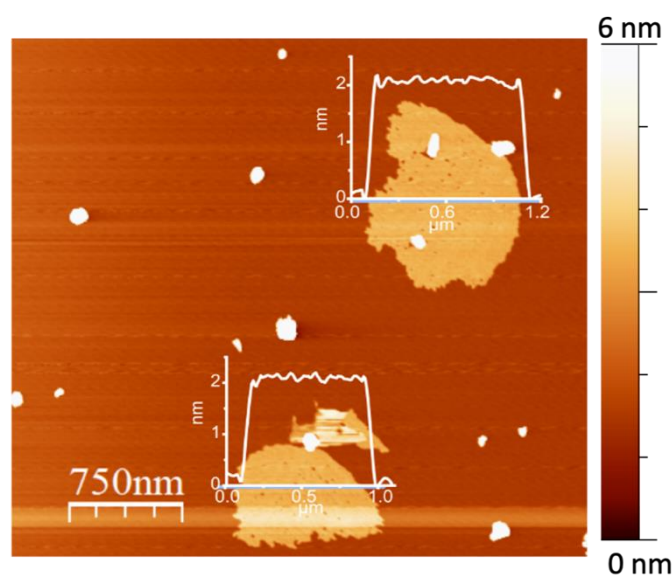

**Figure S21.** AFM topographic characterization of cylindrite nanoflakes obtained in Sample 5. Image dimension:  $0.75 \times 0.75 \mu\text{m}^2$ .

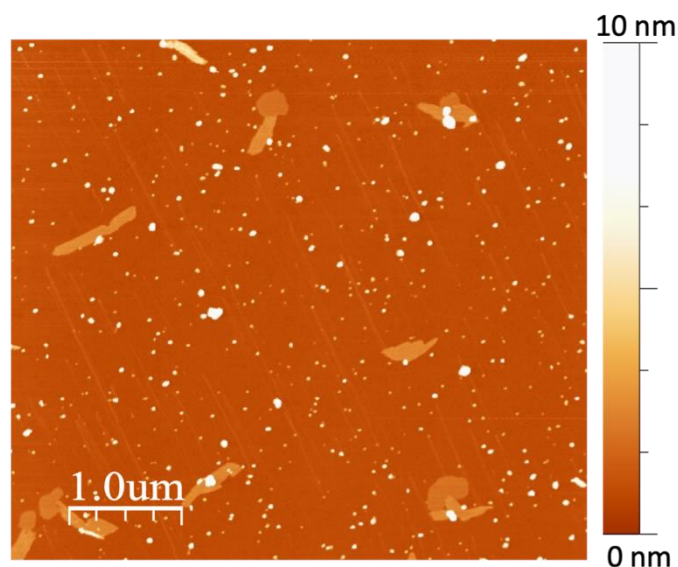

**Figure S22.** AFM topographic characterization of cylindrite nanoflakes obtained in Sample 5. Image dimension:  $5 \times 5 \mu\text{m}^2$ .

### 7. Statistical analysis of type 1 LPE cylindrite nanoflakes.

Figure S23 shows a direct comparison of the thickness in type 1 nanoflakes obtained in Samples 1, 3 and 5. The reduction of the flake thickness with increasing sonication time from sample 1 to sample 5 is clearly observed. The average flake thickness in sample 1 is 7.2 nm. In sample 3, 66% of the flakes have a thickness between 4.3 and 6.3 nm. Finally, the sample 5 measured flakes have thickness between 1 and 2 nm.

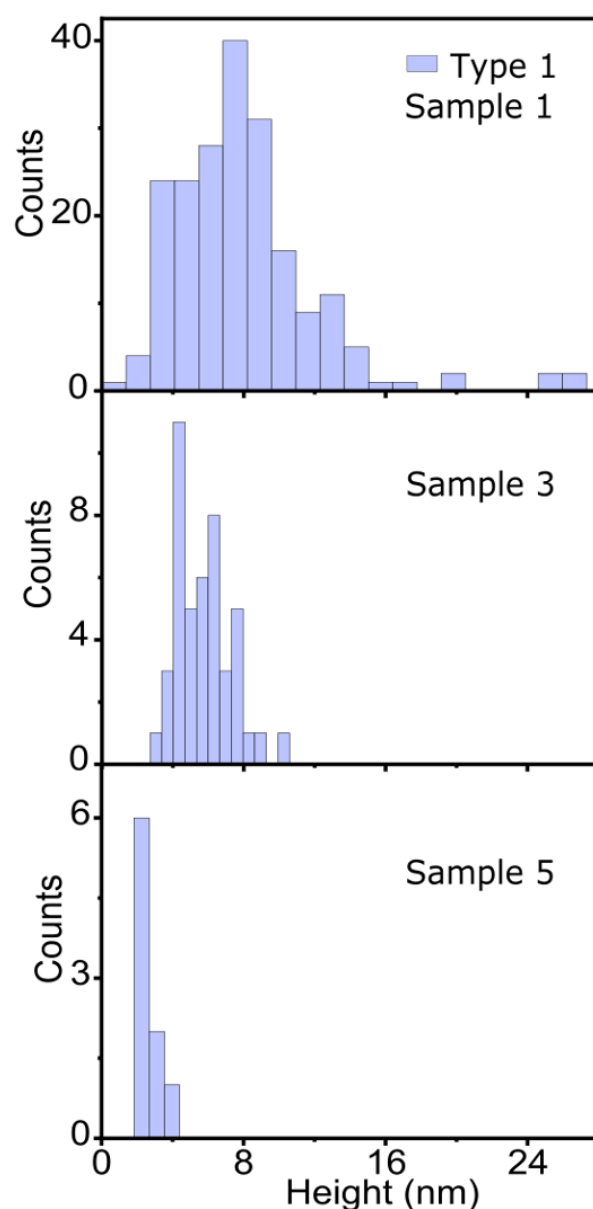

**Figure S23.** Statistical analysis of AFM height of type 1 LPE cylindrite nanoflakes obtained in Samples 1, 3 and 5.

#### 8. Additional SEM images of LPE cylindrite-based devices after DEP assembly.

Additional SEM images of multi-electrode devices after DEP assembly are shown in Figures S24 and S25. Through this mechanism, the LPE cylindrite nanoflakes are transferred and positioned in the gap between the electrodes.

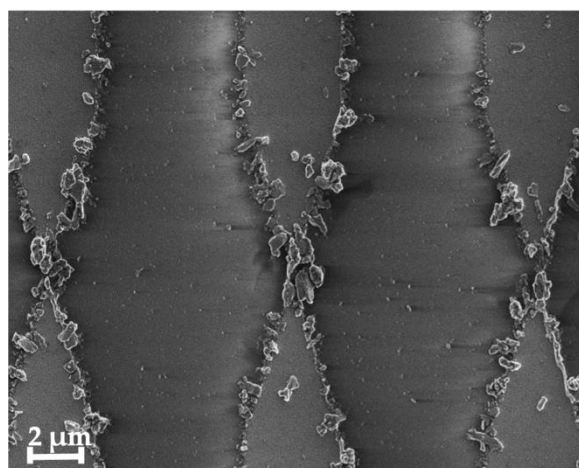

**Figure S24.** SEM images of multi-electrode device after DEP assembly.

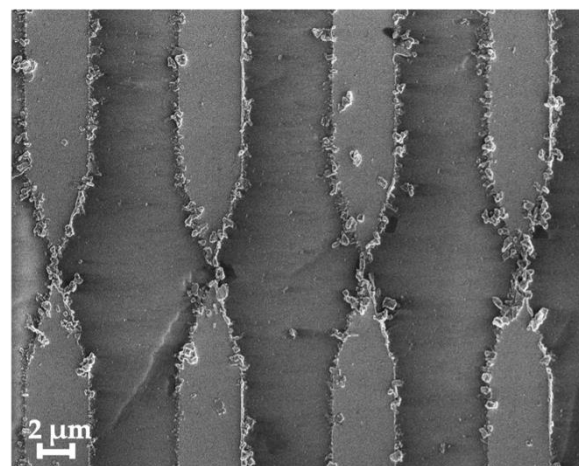

**Figure S25.** SEM images of multi-electrode device after DEP assembly.

### 9. Mathematical description of the equivalent R-CR electrical model.

The frequency response of the admittance  $Y^*$  observed in the main text can be approximately reproduced with a set of two parallel RC circuits connected in series. Each sub-circuit describes the contribution to charge transport of the grain boundaries ( $C_{gb}$ ,  $R_{gb}$ ) and the bulk crystal ( $C_c$ ,  $R_c$ ) [50]. The particular characteristics of the devices presented in the manuscript show that the experimental data can be fitted with a single parallel RC circuit ( $R_1$ ,  $C_1$ ) connected in series with a single  $R_2$  resistance.

Here below, the mathematical description of the resulting circuit is explained in detail. The complex admittance  $Y^*(\omega)$  of a circuit as a function of  $\omega$  angular frequency can be written as the sum of conductance ( $G$ ) and susceptance ( $B$ ):

$$Y^*(\omega) = G(\omega) + i B(\omega) \quad (1)$$

The complex admittance of a resistive and a capacitive element are respectively:

$$Y^*(\omega) = 1/R \quad (2)$$

$$Y^*(\omega) = i \omega C \quad (3)$$

The complex admittance of the resulting parallel RC circuit is:



$$Y^*(\omega) = \frac{1}{R} + i \omega C \quad (4)$$

The addition of the two circuits in series would result in the total  $Y^*$  of the circuit:

$$Y^*(\omega) = \frac{1}{\frac{1}{\frac{1}{R_1} + i \omega C_1} + \frac{1}{R_2}} \quad (5)$$

From Equation (5) and (1) we obtain the  $G$  and  $B$  values of the circuit as:

$$G = \frac{1 + \omega^2 C_1^2 R_1 R_e}{(R_1 + R_2)(1 + \omega^2 R_e^2 C_1^2)} \quad (6)$$

$$B = \frac{\omega(C_1 R_1 R_e)}{R_2(R_1 + R_2)(1 + \omega^2 R_e^2 C_1^2)} \quad (7)$$

where  $R_e$  is the equivalent resistance of the circuit:

$$R_e = \frac{R_1 R_2}{R_1 + R_2} \quad (8)$$

The experimental  $B$  and  $G$  curves as a function of  $\omega$  can be quantitatively reproduced by selecting an appropriate set of  $R$  and  $C$  parameters. The solid lines in Figures 4f and 4g in the main text are calculated by using Equations (6) and (7).
